# Supplementary material for: Outcome measures evaluating physical functioning and their measurement properties in adolescent idiopathic scoliosis: a protocol for a systematic review
Source: PubMed Central journal article supplement — BMJ Open. 2020 Apr 1;10(4):e034286. doi: 10.1136/bmjopen-2019-034286 (PMC7170637; doi:10.1136/bmjopen-2019-034286), 2020-04-01
Supplement: bmjopen-2019-034286supp001.pdf [file bmjopen-2019-034286supp001.pdf]

## Supplementary File 1

## Example of search strategy (MEDLINE)

### Search 1

1. scoliosis.mp.
2. exp Scoliosis/
3. exp Spinal Curvatures/
4. Adolescens\$.mp.
5. exp Adolescent/
6. Physical functioning.mp.
7. exp Physical Functional Performance/
8. Functional activity.mp.
9. independence.mp.
10. Functional independence.mp.
11. exp Health Status/
12. exp performance status/
13. exp Health Behavior/
14. exp Movement/
15. mobility.mp.
16. Functional limitation.mp.
17. Activity limitation.mp.
18. exp Motor Activity/
19. Recovery of function/
20. (Recover\$ adj5 function\$).tw.
21. exp Motor Skills/
22. exp Disability Evaluation/
23. exp Disabled Persons/
24. exp physical examination/
25. exp "Activities of Daily Living"/
26. ((daily or domestic or house or home) adj5 (activit\$ or task\$ or skill\$ or chore\$)).t
27. (Activities of daily living or adl\$ or eadl\$ or iadl\$).tw.
28. exp Self Care/
29. ((self or personal) adj5 (Care or manage\$)).tw.
30. (Dressing or feeding or eating or toilet\$ or bathing or mobil\$ or driving or public transport\$).tw.
31. exp Lifting/
32. Bending.mp.

33. exp sitting/
34. exp Walking/
35. exp Walking Speed/
36. exp Postural Balance/
37. Standing balance.mp.
38. exp Hand Strength/ or Grip strength.mp.
39. 1- 3/OR
40. 4 OR 5
41. 6-38/OR
42. 39 and 40 and 41
43. Limit 42 to humans

## Search 2

44. Name of the Identified outcome measure/s
45. scoliosis.mp.
46. exp Scoliosis/
47. exp Spinal Curvatures/
48. Adolescen\$.mp.
49. exp Adolescent/
50. validity.mp
51. exp validation studies/
52. reliability.mp
53. exp reproducibility of results/
54. interpretability.mp
55. internal consistency.mp
56. exp sensitivity and Specificity/
57. clinical sensitivity.mp
58. exp psychometrics/
59. responsiveness.mp
60. exp Evaluation studies/
61. measurement error.mp
62. measurement properties.mp
63. 45-47/OR
64. 48-49/OR
65. 50-62/OR
66. 44 and 63 and 64 and 65
67. Limit 66 to humans
